# Supplementary material for: Disparity among cyclic alkyl carbonates associated with the cathode–electrolyte interphase at high voltage
Source: Royal Society of Chemistry journal article supplement (doi:10.1039/d4ta01759e), 2024-01-01
Supplement: d4ta01759e1.pdf [file d4ta01759e1.pdf]

## Supporting Information

### Disparity among cyclic alkyl carbonates associated with cathode electrolyte interphase at high voltage

Shuaishuai Chen<sup>a</sup>, YiHan Tang, Zhaoxin Lu, Shun Wu,

Jiliang Wu<sup>\*,b</sup>, Zhenlian Chen<sup>\*,a</sup>, Deyu Wang<sup>\*,a</sup>

a: Key Laboratory of Optoelectronic Chemical Materials and Devices, Ministry of Education, School  
of Optoelectronic Materials & Technology, Jiangnan University, Wuhan 430056, China

b: Wuhan Zhongyuan Changjiang Technology Development Co. Ltd., Wuhan 430090, China

Dr. Jiliang Wu, [jlwu@whu.edu.cn](mailto:jlwu@whu.edu.cn)

Associate Prof. Zhenlian Chen, [zhenlianchen@jhun.edu.cn](mailto:zhenlianchen@jhun.edu.cn)

Prof. Deyu Wang, [wangdeyu@jhun.edu.cn](mailto:wangdeyu@jhun.edu.cn)

## Experimental sections

The several solvents and solutes used in this work were commercial materials, included ethylene carbonate (EC), fluoroethylene carbonate (FEC), propylene carbonate (PC), dimethyl carbonate (DMC), methyl ethyl carbonate (EMC) and  $\text{LiPF}_6$ . The electrolytes with different proportions were prepared in an argon-filled glovebox ( $\text{H}_2\text{O}$  &  $\text{O}_2$  contents < 1 ppm). EC: DMC: EMC / FEC: DMC: EMC / PC: DMC: EMC were mixing with volume ratio=1:1:1,  $\text{LiPF}_6$  was selected as solute. The electrolytes were named EC-based, FEC-based, and PC-based, respectively. The electrolytes and their conductivity are shown in Figure S2&S3.

The measurements of the conductivity of the electrolytes were performed on DDS-307A conductivity meters with a titanium alloy electrode ( $K = 0.01$ ). The linear sweep voltammetry (LSV) measurements were conducted on Solartron electrochemical station. The chemical compositions of CEI films were acquired from FTIR spectra (Bruker ALPHA). The surface morphology of  $\text{LiCoO}_2$  was characterized by both Scanning Electron Microscopy (SEM Quanta 250, FEI) and Transmission Electron Microscopy (TEM, JEM2100, JEOL). The chemical compositions of the cathode interfacial layer were analyzed by XPS (AXIS Ultra, Kratos) with  $\text{Al K}\alpha$  line as an X-ray source. Binding energies were calibrated by using the carbon content ( $\text{C1s} = 284.8 \text{ eV}$ ). The chemical compositions of the cathode interfacial layer were analyzed by TOF-SIMS (TOF SIMS ION-TOF GmbH) with a mass resolution of over 5000. The mass spectrometry was equipped with a 30 kV  $\text{Bi}^+$  analysis beam for depth profiling or high-resolution mapping analysis in high current mode or burst alignment mode. Depending on the secondary ion polarity, a 500 eV  $\text{Cs}^+$  ion beam or a 1 keV  $\text{O}^{2+}$  ion beam was applied for the negative mode. The sputtering and analysis areas are  $100 \times 100 \mu\text{m}^2$ .

The electrochemical performance was achieved on the Land CT2001A multichannel battery cycler equipment by assembling CR2032 coin cell of  $\text{LiCoO}_2/\text{Li}$ . Li foils were used as the negative electrodes. The cathode electrode was prepared by a homogenous slurry which was consisted of 80 wt.% active cathode materials, 10 wt.% super P and 10 wt.% polyvinylidene fluoride (PVDF) binder, dispersing the solid powders in N-methyl pyrrolidone (NMP) solvent. After stirring for 5h, the as-prepared slurry was coated on aluminum (Al) foil. The electrode was dried at  $120^\circ\text{C}$  under vacuum and punched into circular discs with a diameter of 14 mm. The thickness of the Li foil was 200  $\mu\text{m}$ ,

and the amount of the electrolyte used in the coin cell was 70  $\mu$ L.

### **Simulation Method**

DFT calculations are carried out using the Damping Function in Dispersion Corrected<sup>1</sup> density functional theory (DFT) method as implemented in the Gaussian 16 suite of programs (Gaussian 16, Revision B.01, Frisch, M.J., Trucks, G.W., Schlegel, H.B., Scuseria, G.E., Robb, M.A., Cheeseman, J.R.; Scalmani, G.; Barone, V.; Petersson, G.A.; Nakatsuji, H.; Li, X.; Caricato, M.; Marenich, A.V.; Bloino, J.; Janesko, B.G., Gomperts, R., Mennucci, B., Hratchian, H.P., Ortiz, J.V., Izmaylov, A.F., Sonnenberg, J.L., Williams-Young, D., Ding, F., Lipparini, F., Egidi, F., Goings, J., Peng, B., Petrone, A., Henderson, T., Ranasinghe, D., Zakrzewski, V.G., Gao, J., Rega, N., Zheng, G., Liang, W., Hada, M., Ehara, M., Toyota, K., Fukuda, R., Hasegawa, J., Ishida, M., Nakajima, T., Honda, Y., Kitao, O., Nakai, H., Vreven, T., Throssell, K., Montgomery Jr., J.A., Peralta, J.E., Ogliaro, F., Bearpark, M.J., Heyd, J.J., Brothers, E.N., Kudin, K.N., Staroverov, V.N., Keith, T.A., Kobayashi, R., Normand, J., Raghavachari, K., Rendell, A.P., Burant, J.C., Iyengar, S.S., Tomasi, J., Cossi, M., Millam, J.M., Klene, M., Adamo, C., Cammi, R., Ochterski, J.W., Martin, R.L., Morokuma, K., Farkas, O., Foresman, J.B., Fox, D.J. Gaussian, Inc., Wallingford CT (2016) ) with the basis sets 6-311G+(d,p).<sup>2, 3</sup> For each transition state, intrinsic reaction coordinate (IRC) calculation is performed in both directions to connect these corresponding intermediates at the above level.

**Figure S1.** The molecular structure of the decomposition products and carbon chain number.

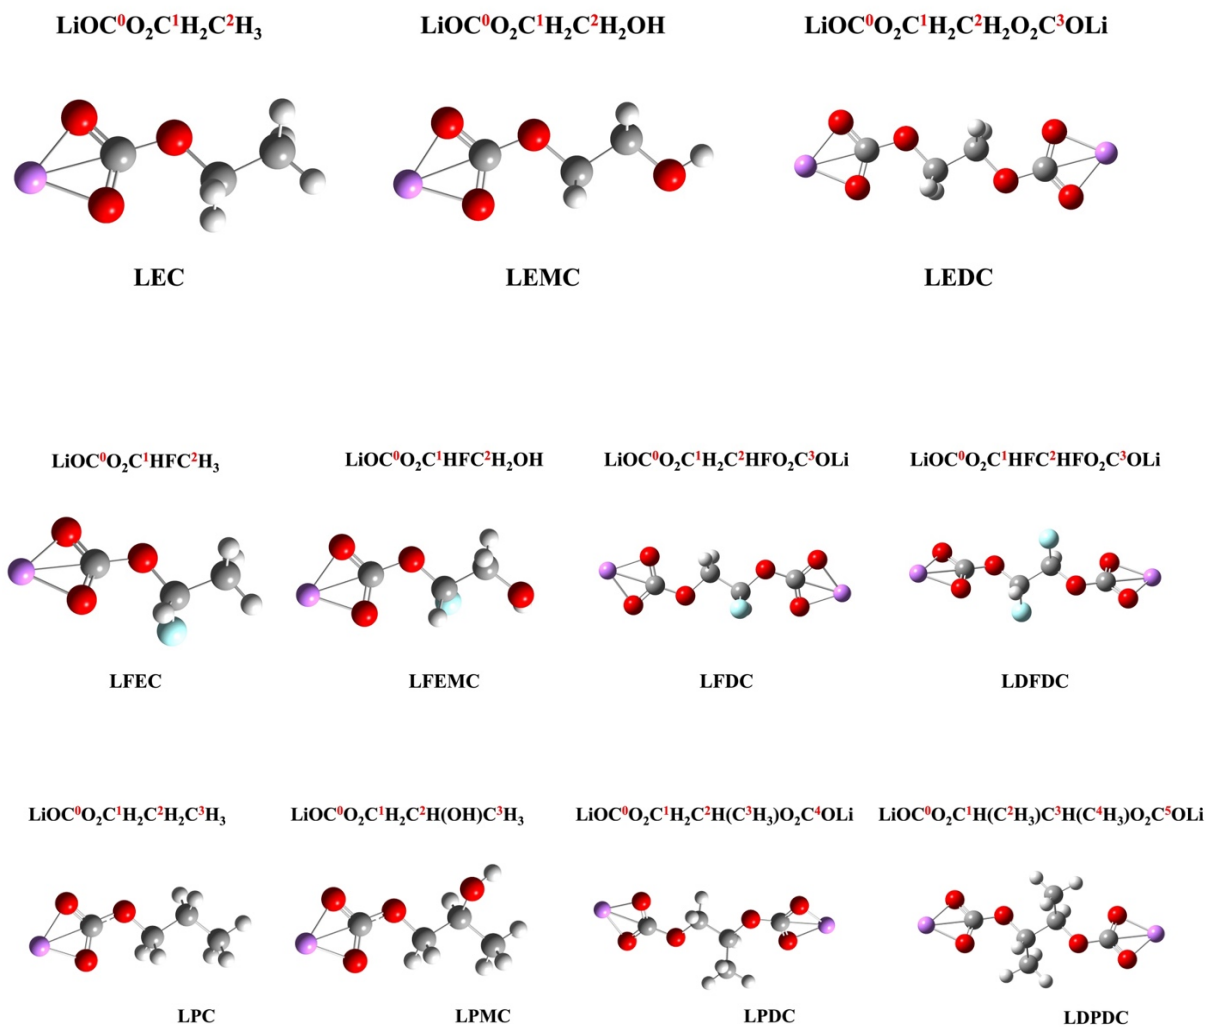

**Figure S2.** The photos of three electrolytes.

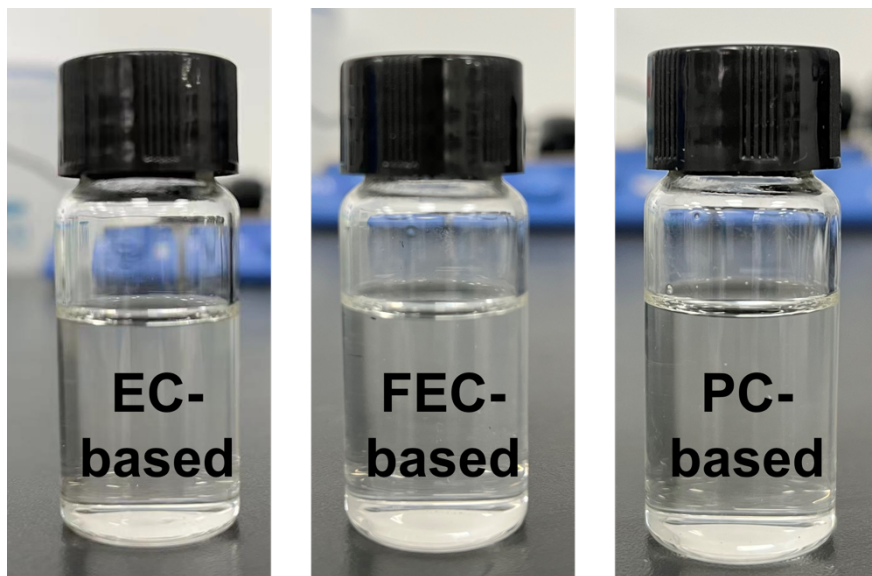

**Figure S3.** Conductivity of three electrolytes.

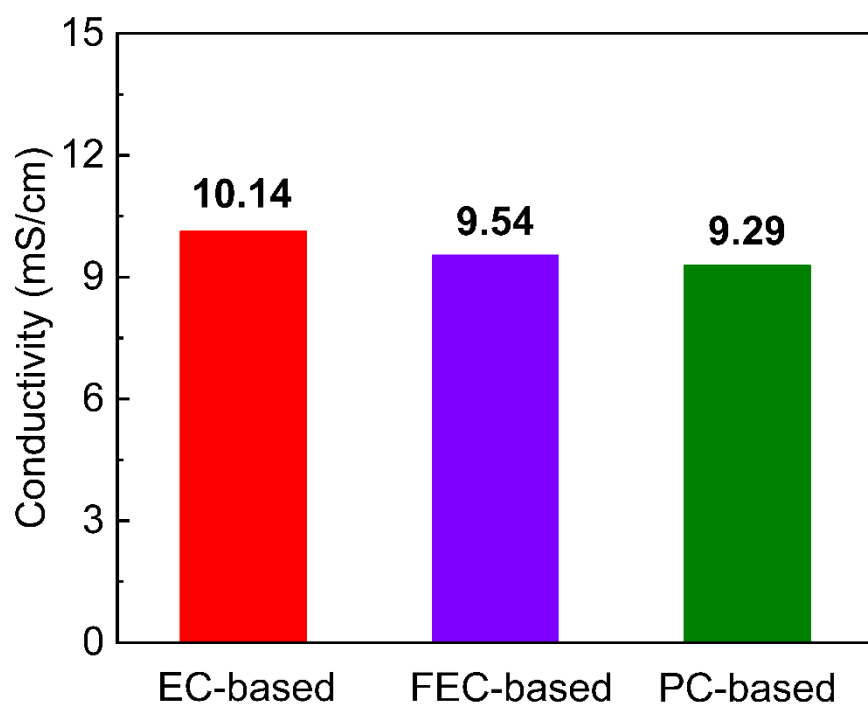

**Figure S4.** The test of constant-voltage polarization.

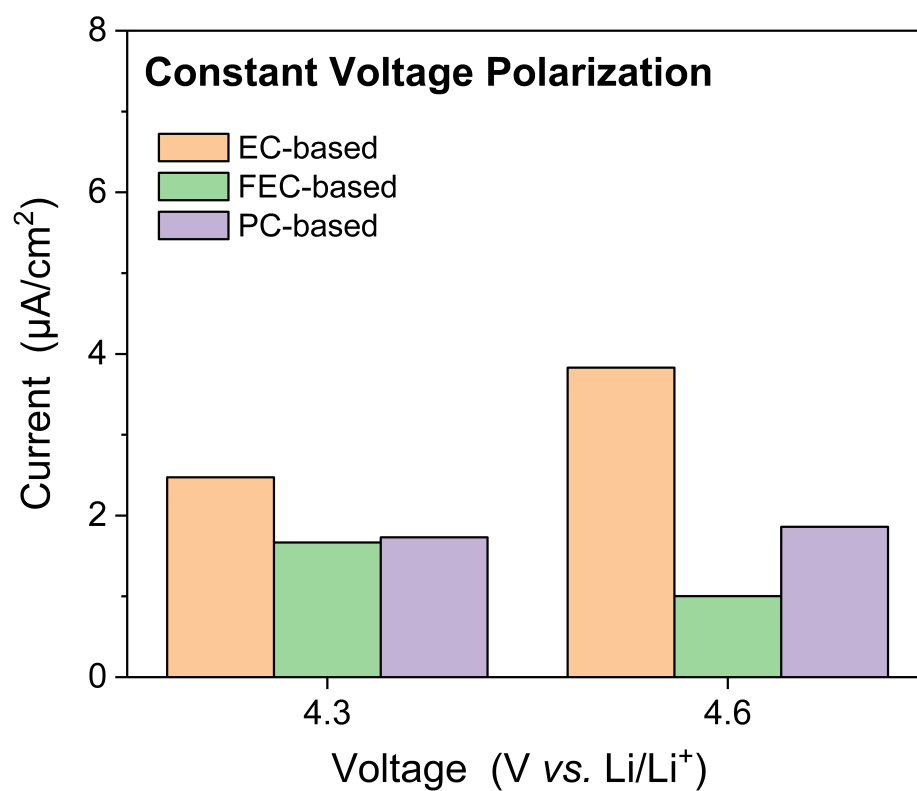

**Figure S5.** Electrochemical performance of Li/LiCoO<sub>2</sub> cells with different electrolytes at 2.8-4.3V/4.6

V (vs. Li/Li<sup>+</sup>), the rate is 0.1 C in first cycle and 1 C in 300<sup>th</sup> cycle.

| The capacity ratio of 300th/1st |           |          |          |           |          |
|---------------------------------|-----------|----------|----------|-----------|----------|
| EC-4.3 V                        | FEC-4.3 V | PC-4.3 V | EC-4.6 V | FEC-4.6 V | PC-4.6 V |
| 69.09%                          | 79.88%    | 74.60%   | 7.71%    | 73.84%    | 66.05%   |

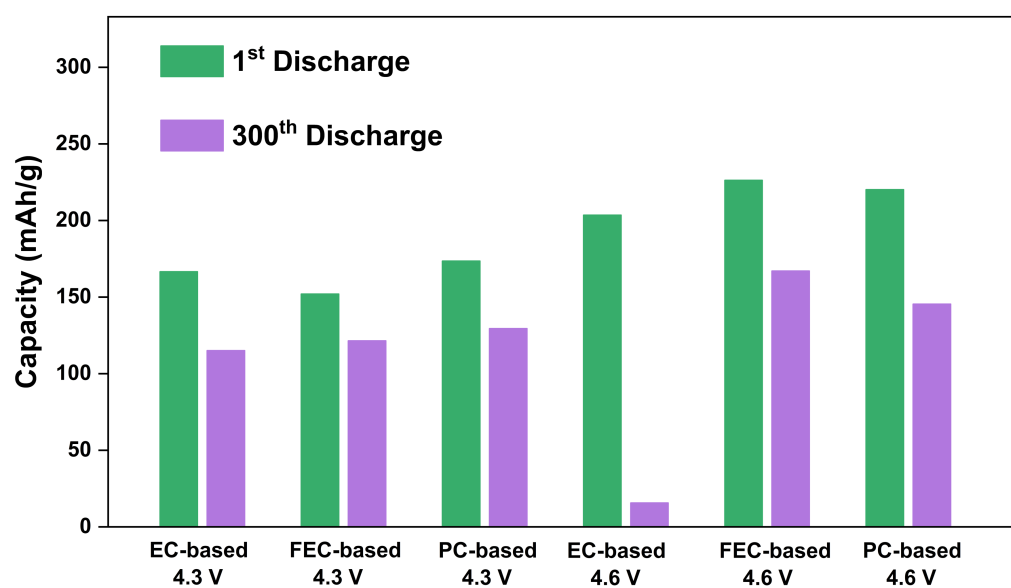

**Figure S6.** TOF-SIMS analysis of EC-based by negative mode with cut-off voltage of 4.3 V vs. Li/Li<sup>+</sup>.

Depth profile curves of three different electrolytes.

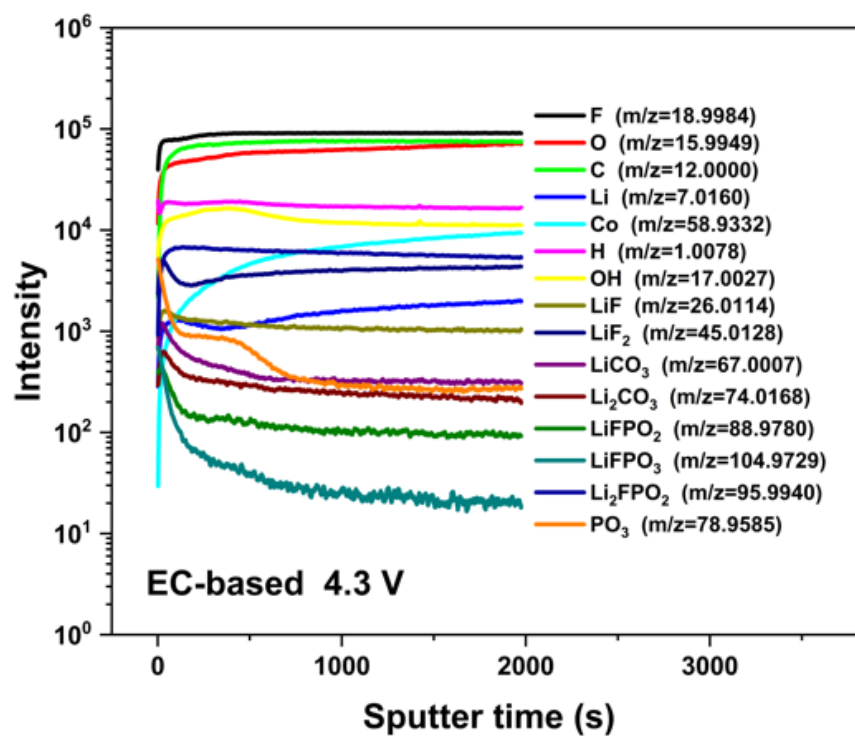

**Figure S7.** TOF-SIMS analysis of FEC-based by negative mode with cut-off voltage of 4.3 V vs. Li/Li<sup>+</sup>.

Depth profile curves of all signal information.

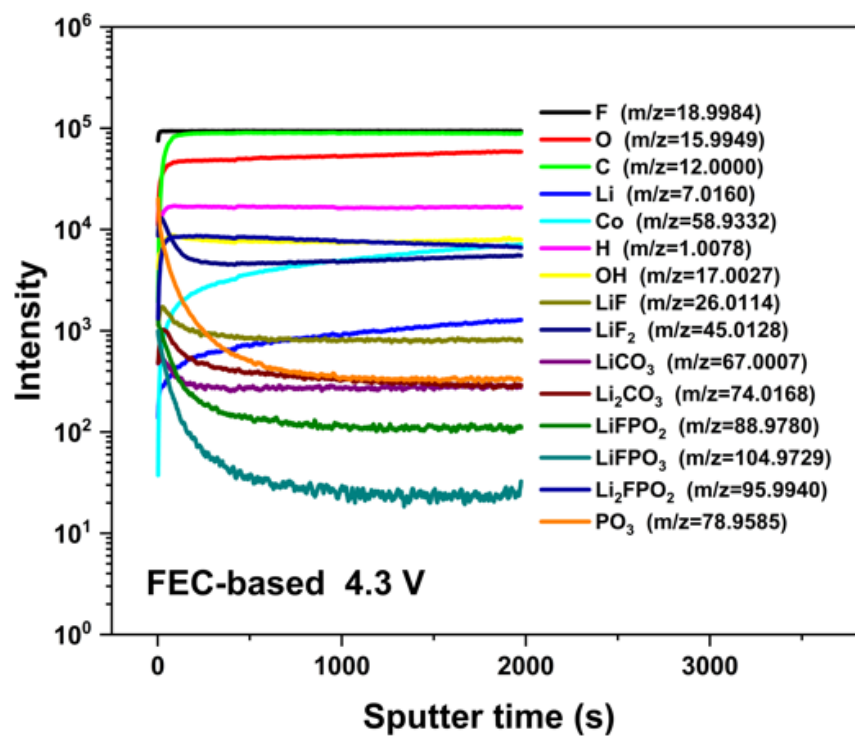

**Figure S8.** TOF-SIMS analysis of PC-based by negative mode with cut-off voltage of 4.3 V vs. Li/Li<sup>+</sup>.

Depth profile curves of all signal information.

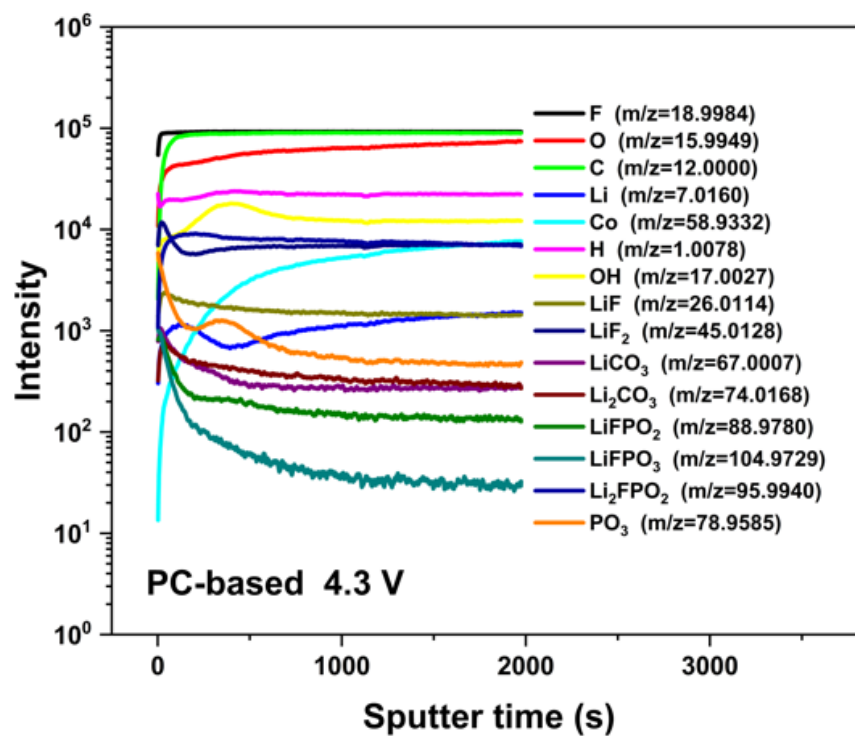

**Figure S9.** TOF-SIMS analysis by negative mode with cut-off voltage of 4.3V vs. Li/Li<sup>+</sup>. Mass spectrum

collected at sputter stage, (a) EC-based, (b) FEC-based, (c) PC-based.

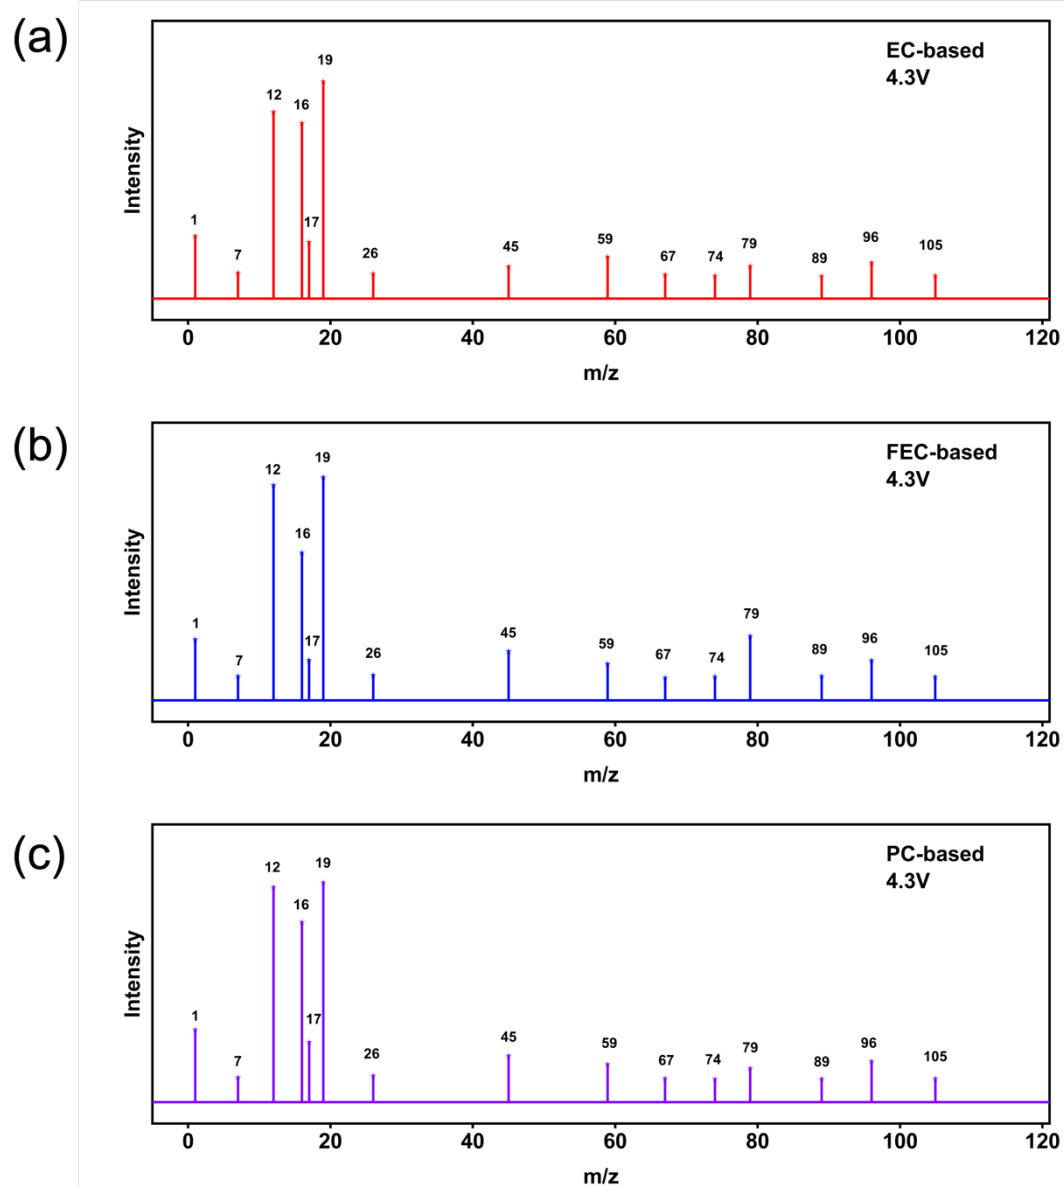

**Figure S10.** TOF-SIMS analysis of EC-based by negative mode with cut-off voltage of 4.6 V vs. Li/Li<sup>+</sup>.

Depth profile curves of all signal information.

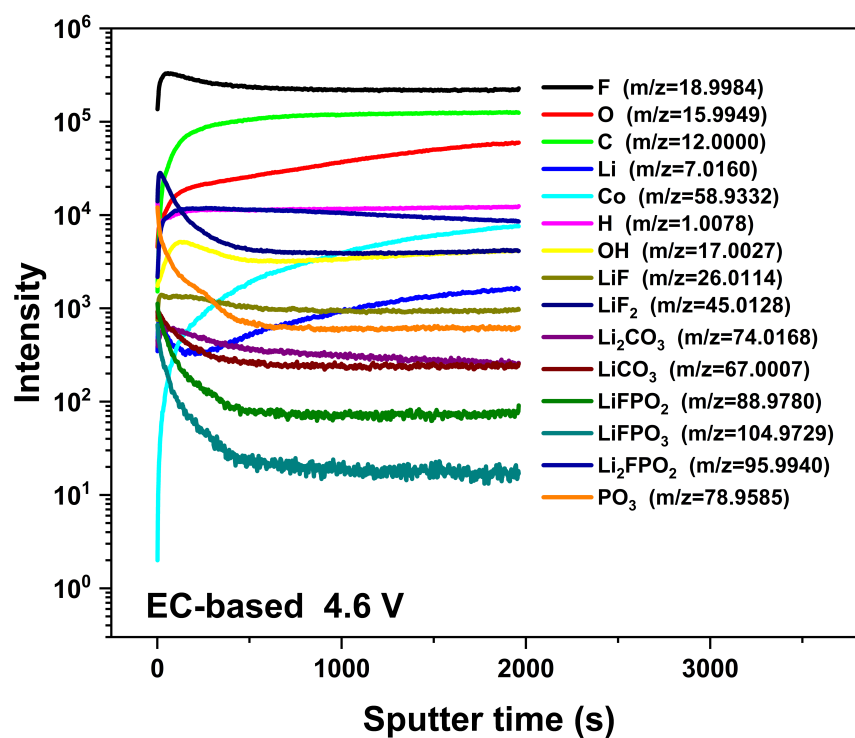

**Figure S11.** TOF-SIMS analysis of FEC-based by negative mode with cut-off voltage of 4.6 V vs. Li/Li<sup>+</sup>.

Depth profile curves of all signal information.

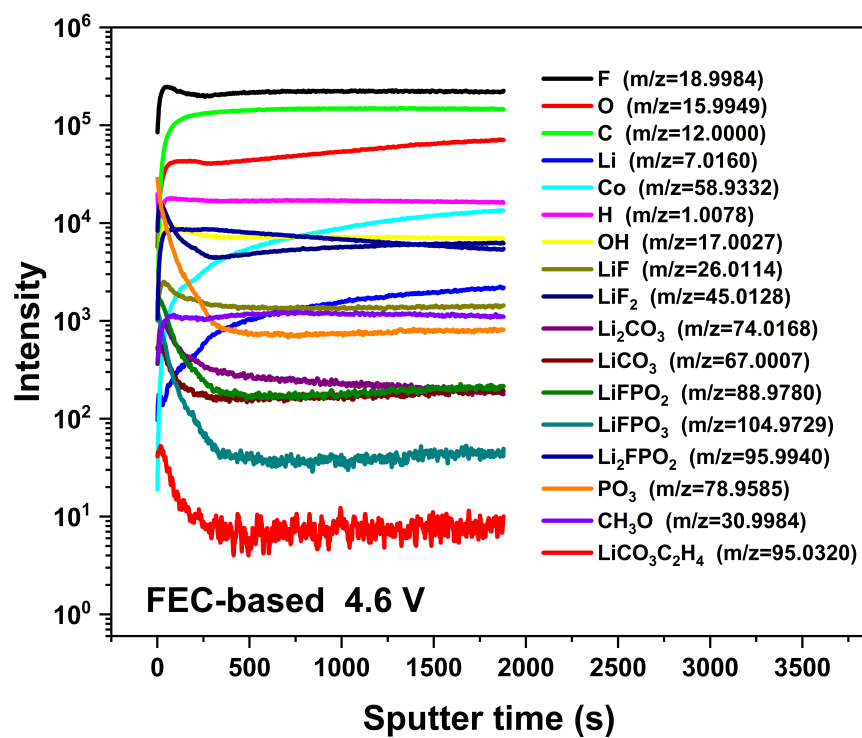

**Figure S12.** TOF-SIMS analysis of PC-based by negative mode with cut-off voltage of 4.6 V vs. Li/Li<sup>+</sup>.

Depth profile curves of all signal information.

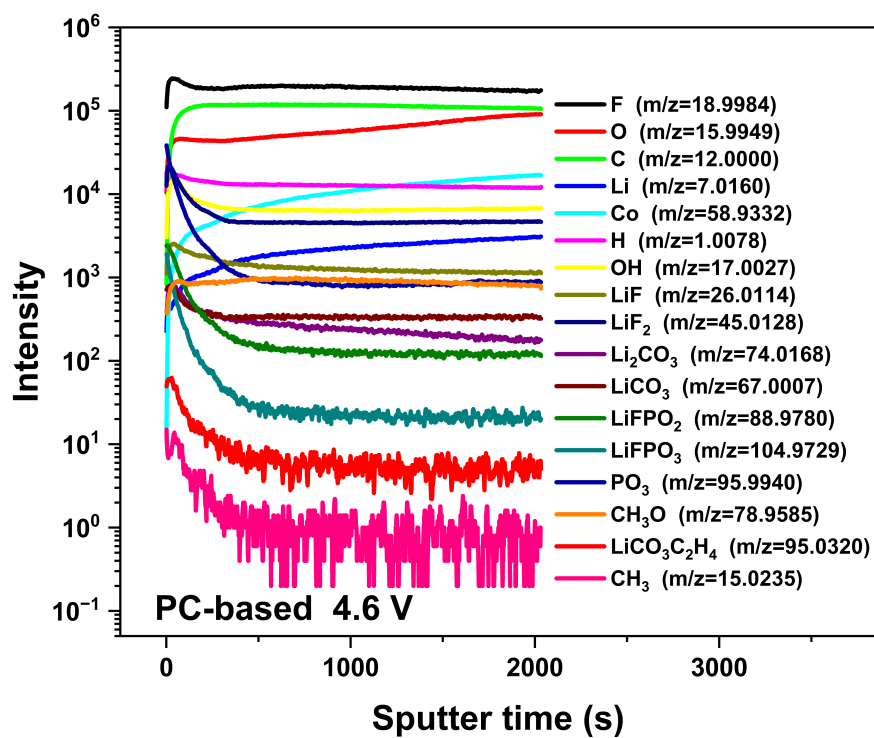

**Figure S13.** SEM images of LiCoO<sub>2</sub> electrodes uncycled and after 5 charge/discharge cycles in different electrolytes. (a) Fresh, (b) EC-based, (c) FEC-based, (d) PC-based.

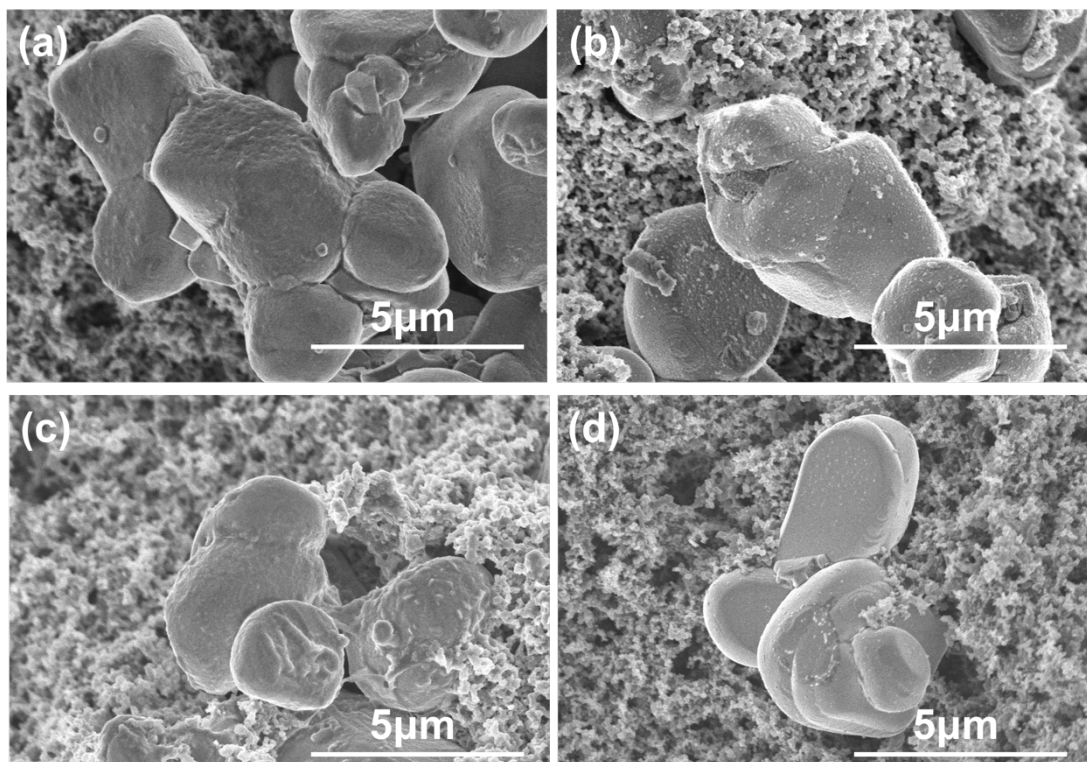

**Figure S14.** TEM images of LiCoO<sub>2</sub> electrode after 5 charge/discharge cycles with different electrolytes

at 4.3 V vs. Li/Li<sup>+</sup>. (a). EC-based, (b). FEC-based, (c). PC-based.

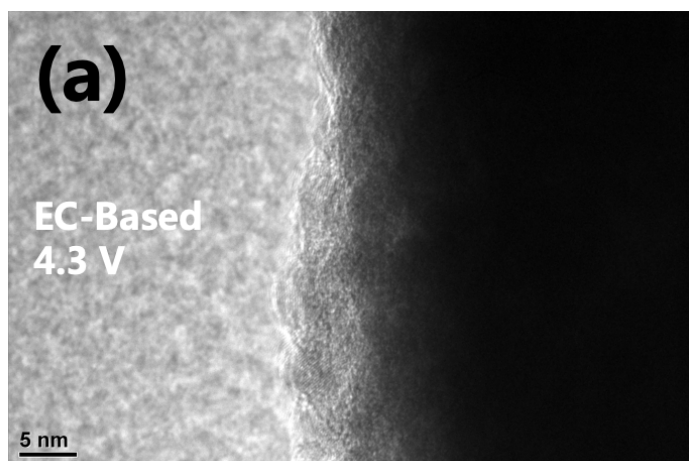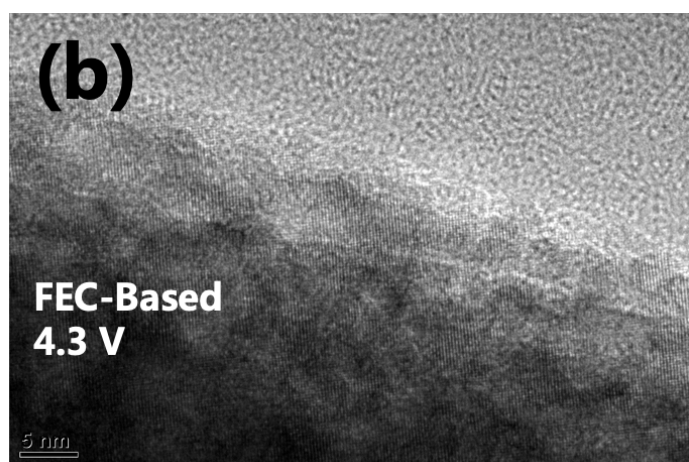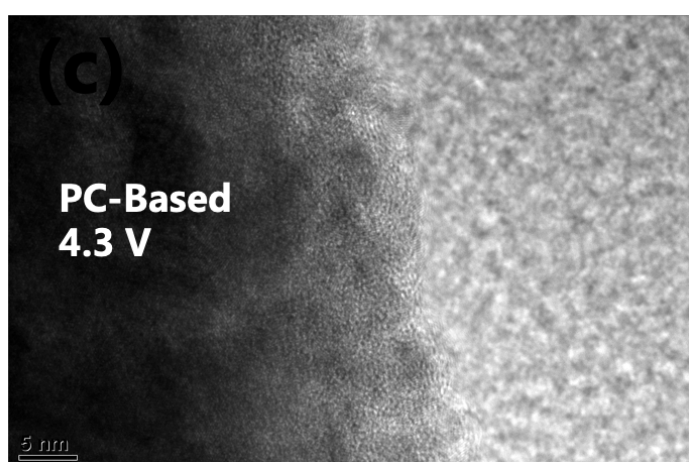

**Figure S15.** XPS spectra of Co 2p.

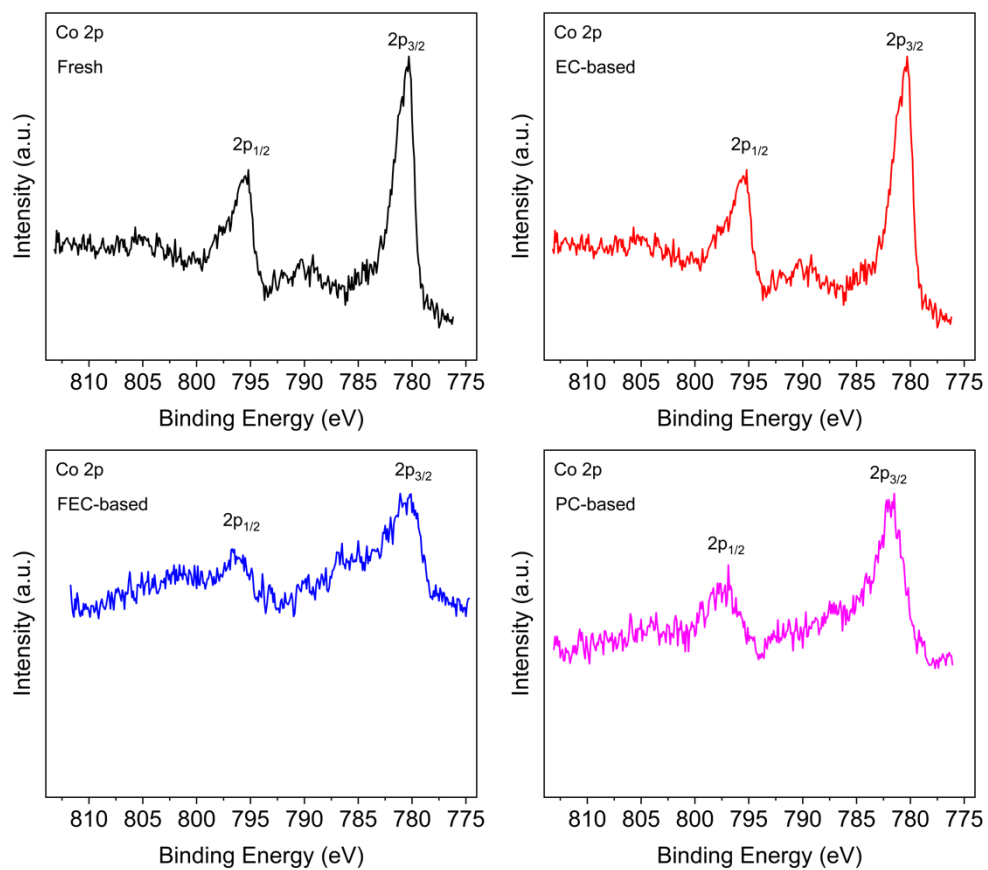

**Table S1.** The absolute values of calculated LUMO, HOMO and calculated value of  $\Delta G_R$ ,  $\Delta G_O$ ,  $\Delta G_H$  for 11 possible side products.

| Solvent   | Name  | LUMO  | HOMO  | $\Delta G_O$ | $\Delta G_{H-1}$ | $\Delta G_{H-2}$ | $\Delta G_{H-3}$ | $\Delta G_{H-O}$ |
|-----------|-------|-------|-------|--------------|------------------|------------------|------------------|------------------|
| EC-based  | LEC   | -1.07 | -7.32 | 9.04         | 3.72             | 4.05             |                  |                  |
|           | LEMC  | -1.10 | -7.36 | 9.01         | 4.19             | 3.67             |                  | 3.94             |
|           | LEDC  | -1.06 | -7.28 | 8.62         | 3.74             | 3.74             |                  |                  |
| FEC-based | LFEC  | -1.20 | -7.68 | 9.24         | 3.89             | 4.07             |                  |                  |
|           | LFEMC | -1.31 | -7.77 | 9.36         | 3.97             | 3.69             |                  | 4.05             |
|           | LFDC  | -1.18 | -7.38 | 8.80         | 3.74             | 3.81             |                  |                  |
|           | LDFDC | -1.20 | -7.70 | 9.02         | 4.00             | 4.00             |                  |                  |
| PC-based  | LPC   | -1.07 | -7.26 | 8.91         | 3.97             | 3.78             | 3.92             |                  |
|           | LPMC  | -1.04 | -7.23 | 8.48         | 3.74             | 3.51             | 4.08             | 3.75             |
|           | LPDC  | -1.05 | -7.24 | 8.56         | 3.79             | 3.78             | 3.92             |                  |
|           | LDPDC | -1.03 | -7.21 | 8.48         | 3.79             | 3.99             |                  |                  |

(The serial number of C carbon is shown in Figure S14. H-1 corresponds to H atom on C<sup>1</sup> atom, H-2 corresponds to H atom on C<sup>2</sup> atom, H-3 corresponds to H atom on C<sup>3</sup> atom, H-O corresponds to H atom on hydroxyl.)

**Table S2.** Decomposition products information.

| <b>Name</b>                            | <b>Short Name</b>               | <b>Chemical Formula</b>                                                     | <b>Molecular Formula</b>                                               | <b>Molecular Weight</b> | <b>m/z</b> |
|----------------------------------------|---------------------------------|-----------------------------------------------------------------------------|------------------------------------------------------------------------|-------------------------|------------|
| Lithium ethyl carbonate                | LEC                             | C <sub>3</sub> H <sub>5</sub> LiO <sub>3</sub>                              | LiOCO <sub>2</sub> CH <sub>2</sub> CH <sub>3</sub>                     | 96.0100                 | 96.0399    |
| Lithium ethylene mono-carbonate        | LEM <sub>C</sub>                | C <sub>3</sub> H <sub>5</sub> LiO <sub>4</sub>                              | LiOCO <sub>2</sub> CH <sub>2</sub> CH <sub>2</sub> OH                  | 112.0090                | 112.0348   |
| Lithium ethylene di-carbonate          | LEDC                            | C <sub>4</sub> H <sub>4</sub> Li <sub>2</sub> O <sub>6</sub>                | (CH <sub>2</sub> CO <sub>2</sub> OLi) <sub>2</sub>                     | 161.9500                | 162.0328   |
| Lithium fluoroethyl carbonate          | LFEC                            | C <sub>3</sub> H <sub>4</sub> FLiO <sub>3</sub>                             | LiOCO <sub>2</sub> CHFCH <sub>3</sub>                                  | 114.0004                | 114.0305   |
| Lithium fluoroethylene mono-carbonate  | LFEM <sub>C</sub>               | C <sub>3</sub> H <sub>4</sub> FLiO <sub>4</sub>                             | LiOCO <sub>2</sub> CHFCH <sub>2</sub> OH                               | 129.9994                | 130.0254   |
| Lithium fluoroethylene di-carbonate    | LFDC                            | C <sub>4</sub> H <sub>3</sub> FLi <sub>2</sub> O <sub>6</sub>               | LiOCO <sub>2</sub> C <sub>2</sub> FFH <sub>3</sub> CO <sub>2</sub> OLi | 179.9404                | 180.0234   |
| Lithium di-fluoroethylene di-carbonate | LD <sub>2</sub> FD <sub>C</sub> | C <sub>4</sub> H <sub>2</sub> F <sub>2</sub> Li <sub>2</sub> O <sub>6</sub> | (C <sub>2</sub> FFH <sub>3</sub> CO <sub>2</sub> OLi) <sub>2</sub>     | 197.9308                | 198.0140   |
| Lithium propyl carbonate               | LPC                             | C <sub>4</sub> H <sub>7</sub> LiO <sub>3</sub>                              | LiOCO <sub>2</sub> CH <sub>2</sub> CH <sub>2</sub> CH <sub>3</sub>     | 110.0370                | 110.0555   |
| Lithium propylene mono-carbonate       | LP <sub>MC</sub>                | C <sub>4</sub> H <sub>7</sub> LiO <sub>4</sub>                              | LiOCO <sub>2</sub> CH <sub>2</sub> CH(OH)CH <sub>3</sub>               | 126.0360                | 126.0504   |
| Lithium propylene di-carbonate         | LPDC                            | C <sub>5</sub> H <sub>6</sub> Li <sub>2</sub> O <sub>6</sub>                | LiOCO <sub>2</sub> C <sub>3</sub> H <sub>6</sub> CO <sub>2</sub> OLi   | 175.9770                | 176.0484   |
| Lithium di-propylene di-carbonate      | LD <sub>2</sub> PDC             | C <sub>6</sub> H <sub>8</sub> Li <sub>2</sub> O <sub>6</sub>                | (C <sub>2</sub> H <sub>4</sub> CO <sub>2</sub> OLi) <sub>2</sub>       | 190.0040                | 190.0641   |

**Table S3.** The molecular structural formula of solvent and decomposition products.

| Solvent | Structural formula                                                                 | Decomposition products                                                                                                                                                                                                                                                                                                                                                                                                                                  |
|---------|------------------------------------------------------------------------------------|---------------------------------------------------------------------------------------------------------------------------------------------------------------------------------------------------------------------------------------------------------------------------------------------------------------------------------------------------------------------------------------------------------------------------------------------------------|
| EC      | 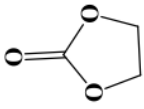 | <div> 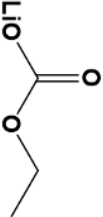 <br/>(LEC) </div> <div> 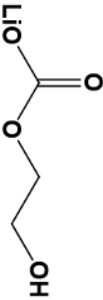 <br/>(LEMCM) </div> <div> 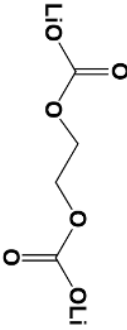 <br/>(LEDMD) </div>                                                                                                                  |
| FEC     | 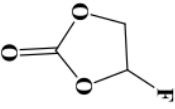  | <div> 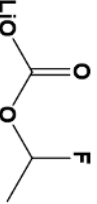 <br/>(LFEC) </div> <div> 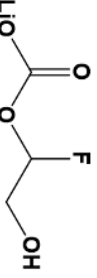 <br/>(LFEMCM) </div> <div> 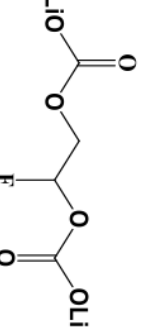 <br/>(LFEDMD) </div> <div> 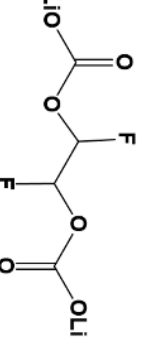 <br/>(LDFDFMD) </div> |
| PC      | 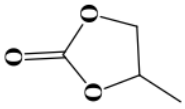  | <div> 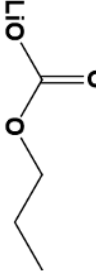 <br/>(LPC) </div> <div> 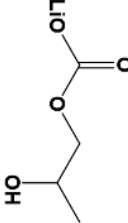 <br/>(LPMC) </div> <div> 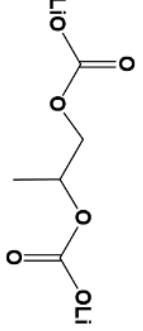 <br/>(LPDPC) </div> <div> 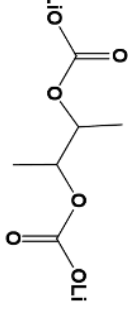 <br/>(LDPDFMD) </div>     |

**Table S4.** Content percent (%) of element F in different bonds.

| XPS Peak/(%) | C-F & Li <sub>x</sub> P <sub>y</sub> FO <sub>z</sub> | LiF   |
|--------------|------------------------------------------------------|-------|
| EC-based     | 83.52                                                | 16.48 |
| FEC-based    | 66.31                                                | 33.69 |
| PC-based     | 79.03                                                | 21.97 |

## References

- (1) Grimme, S.; Ehrlich, S.; Goerigk, L. Effect of the damping function in dispersion corrected density functional theory. *J Comput Chem* **2011**, 32 (7), 1456-1465. DOI: 10.1002/jcc.21759.
- (2) Weigend, F.; Ahlrichs, R. Balanced basis sets of split valence, triple zeta valence and quadruple zeta valence quality for H to Rn: Design and assessment of accuracy. *Phys Chem Chem Phys* **2005**, 7 (18), 3297-3305. DOI: 10.1039/b508541a.
- (3) Weigend, F. Accurate Coulomb-fitting basis sets for H to Rn. *Phys Chem Chem Phys* **2006**, 8 (9), 1057-1065. DOI: 10.1039/b515623h.
